# Supplementary figures and images for: A natural quercetin-based fluorescent sensor for highly sensitive and selective detection of copper ions
Source: Royal Society of Chemistry journal article supplement (doi:10.1039/c5ay00375j), 2015-01-01

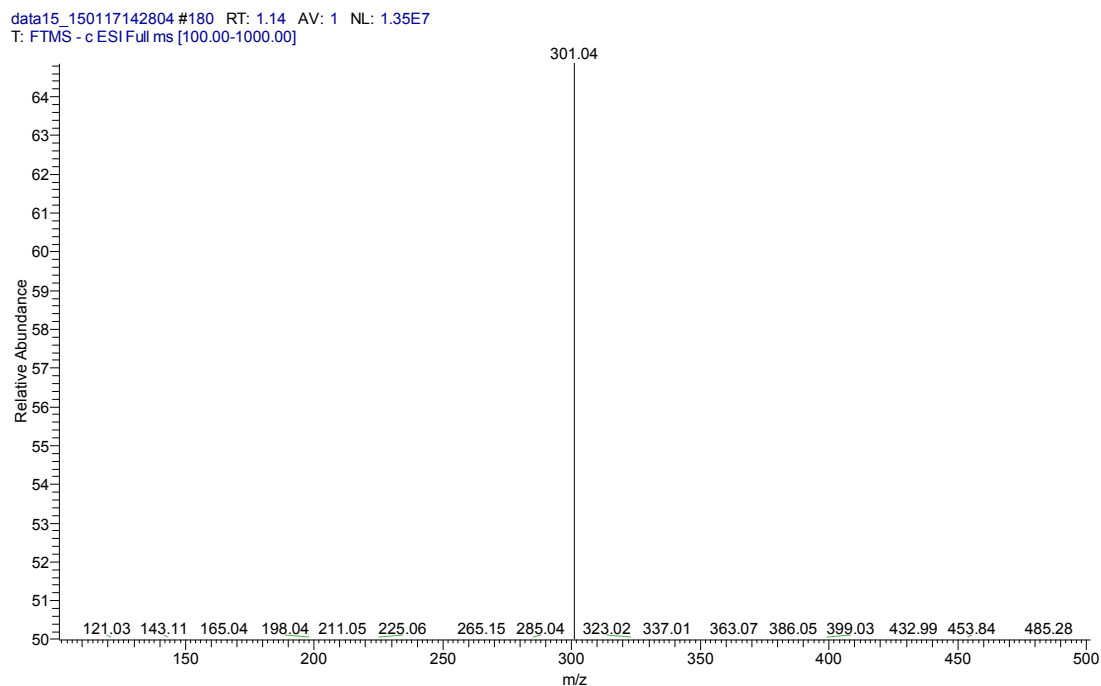

Fig.S1 The mass sepcturm of Q

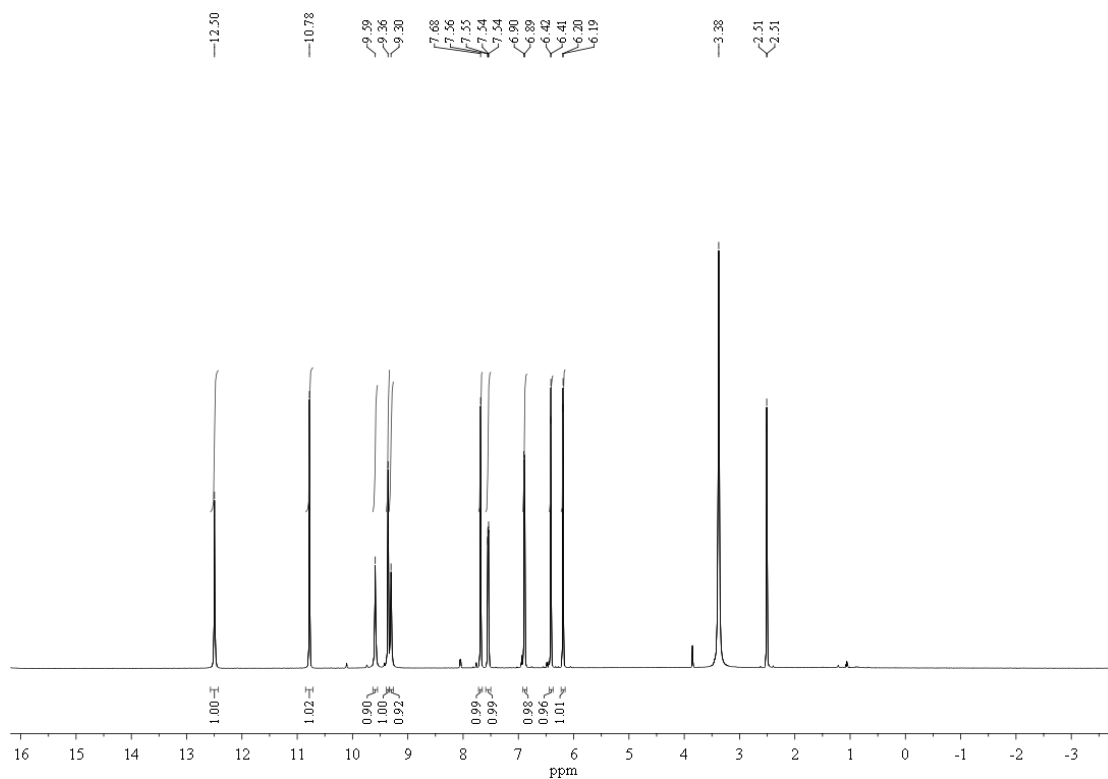

Fig.S2 The  $^1\text{H}$ NMR of Q

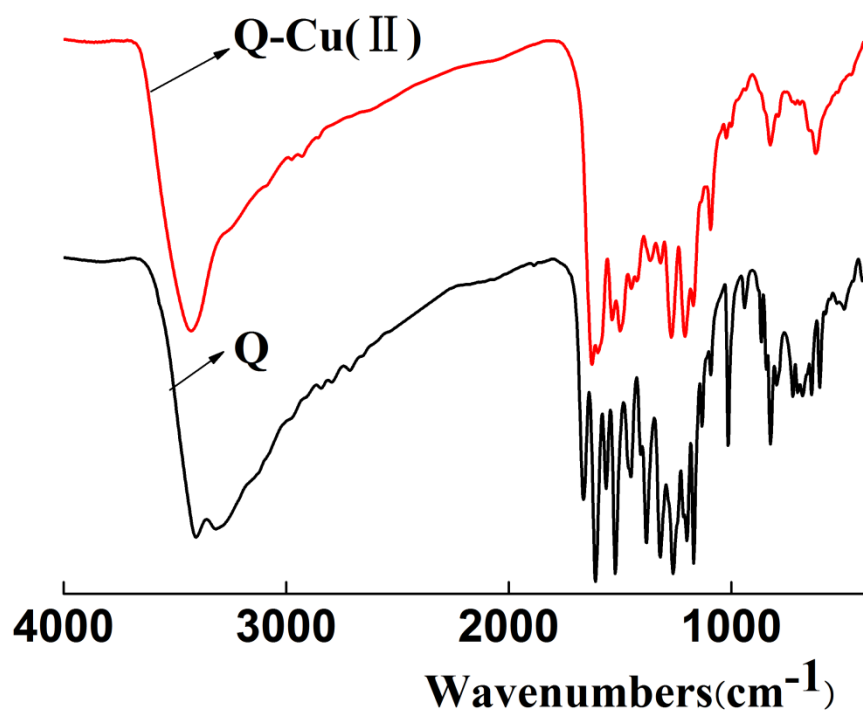

Fig.S3 The FTIR spectrum of Q and Q-Cu(II)

Supplement: c5ay00375j1.pdf [file c5ay00375j1.pdf]
